# Supplementary material for: Beneficial Effects of Dietary Nitrite on a Model of Nonalcoholic Steatohepatitis Induced by High-Fat/High-Cholesterol Diets in SHRSP5/Dmcr Rats: A Preliminary Study
Source: MDPI journal article supplement (doi:10.3390/ijms23062931), 2022-03-08
Supplement: s1 [file s1]

## Supplementary Figures

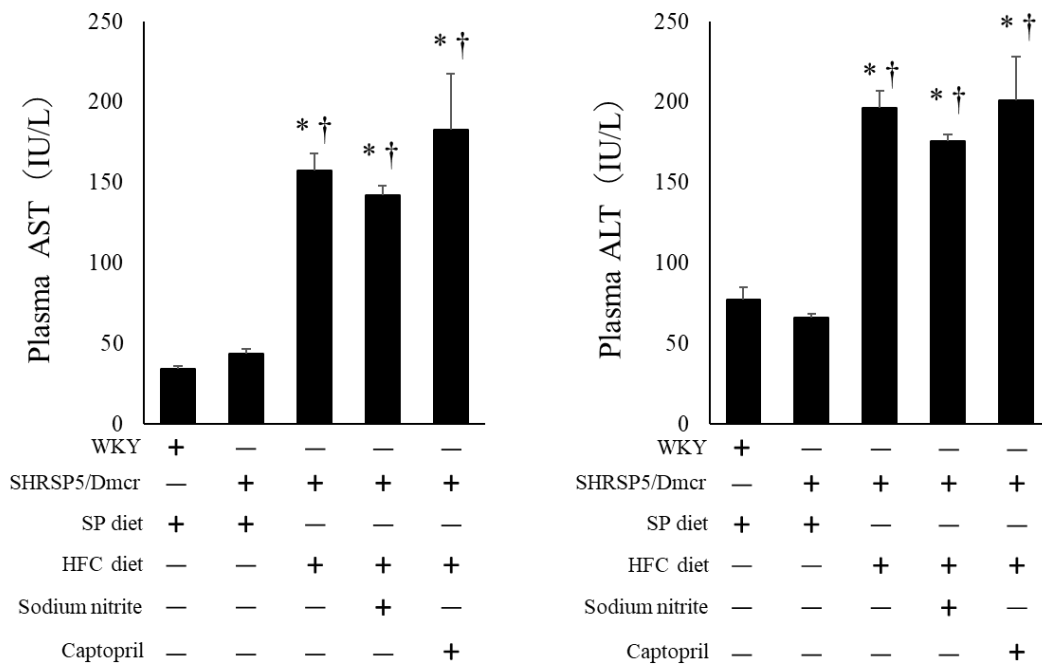

**Figure S1: Effects of nitrite and captopril supplementation on plasma levels of AST and ALT in rat nonalcoholic steatohepatitis model.**

Values represent mean  $\pm$  SE (n=6), \* $P$ <0.05 vs. WKY + SP diet group,  $^{\dagger}P$ <0.05 vs. SHRSP5/Dmcr + SP diet group.

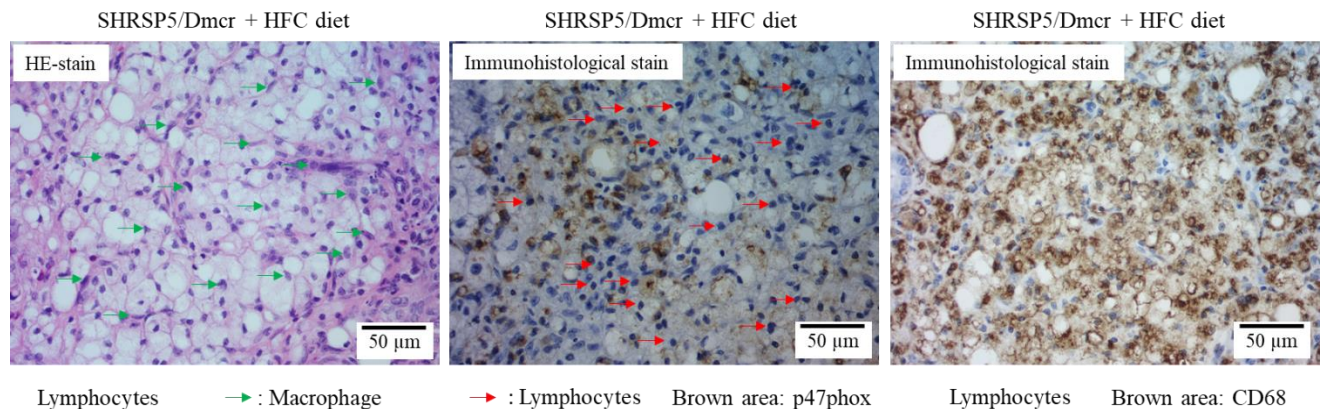

**Figure S2: Inflammatory cells in the liver of rat nonalcoholic steatohepatitis model.**

Inflammatory cell infiltration is composed of macrophages and lymphocytes (left: HE staining). Identification of inflammatory cells by immunostaining with the antibodies of p47phox (middle) and CD68 (right).

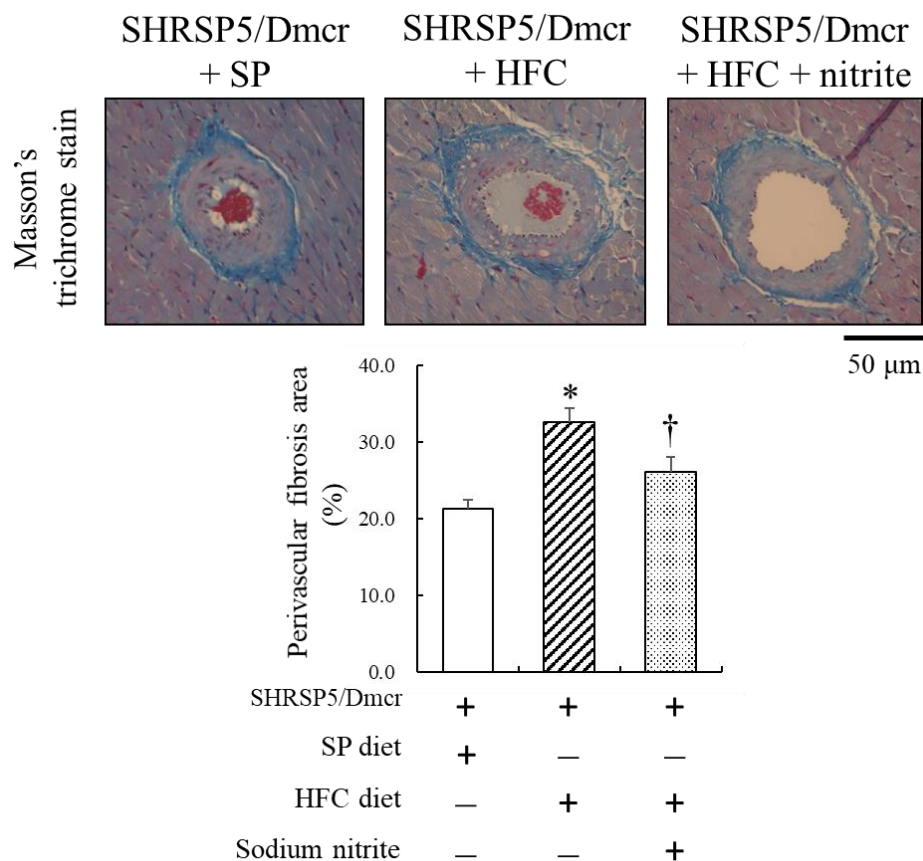

**Figure S3: Histological assessment of coronary arterioles in rat nonalcoholic steatohepatitis model treated with/without nitrite.**

SHRSP5/Dmcr rats were divided into three groups, each fed the SP diet, HFC diet, or HFC diet with nitrite supplementation in drinking water (500 mg/L) for 4 weeks.

Values represent mean  $\pm$  SE (n=4), \* $P$ <0.05, vs. the SHRSP5/Dmcr + SP diet group,  $^{\dagger}P$ <0.05, vs. the SHRSP5/Dmcr + HFC diet group.

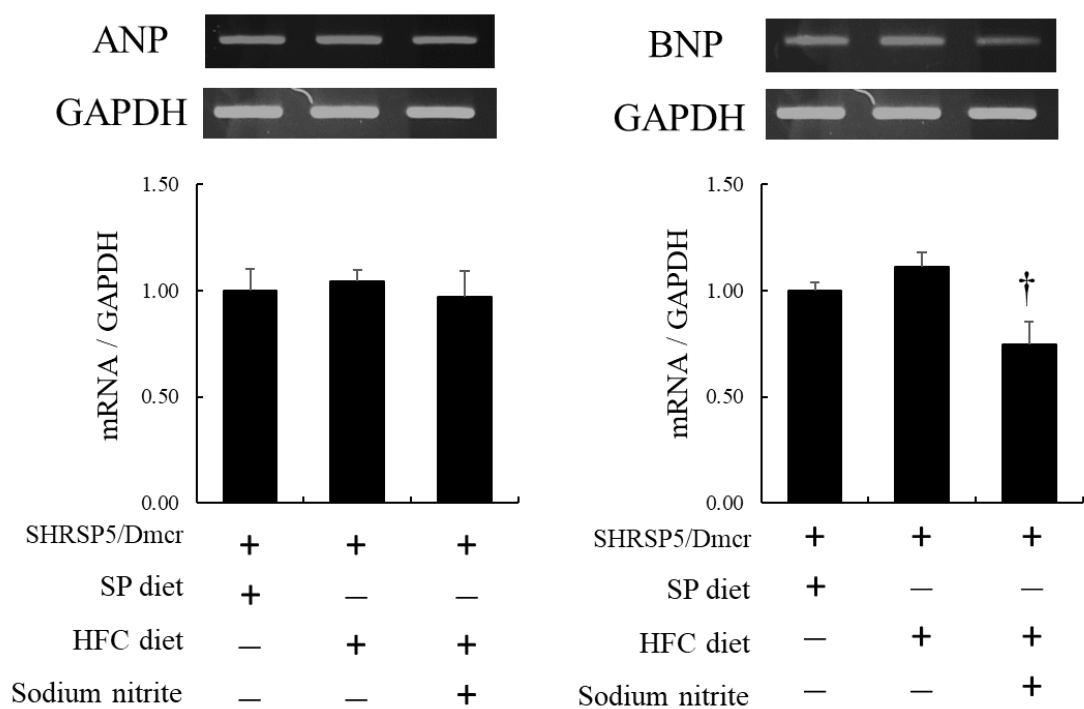

**Figure S4: Myocardial transcription levels of ANP and BNP in the rat nonalcoholic steatohepatitis model treated with/without nitrite.**

SHRSP5/Dmcr rats were divided into three groups, each fed the SP diet, HFC diet, or HFC diet with nitrite supplementation in drinking water (500 mg/L) for 4 weeks.

Values represent mean  $\pm$  SE ( $n = 4$ ),  $^{\dagger}P < 0.05$ , vs. the SHRSP5/Dmcr + HFC diet group.

ANP, atrial natriuretic peptide; BNP, brain natriuretic peptide.
